# Supplementary material for: Impacts of rice varieties and management on yield-scaled greenhouse gas emissions from rice fields in China: A meta-analysis
Source: Copernicus journal article supplement (doi:10.5194/bg-11-3685-2014), 2014-07-10
Supplement: Supplementary file 1 [file bg-11-3685-2014-supplement.pdf]

Supplement of Biogeosciences, 11, 3685–3693, 2014  
<http://www.biogeosciences.net/11/3685/2014/>  
doi:10.5194/bg-11-3685-2014-supplement  
© Author(s) 2014. CC Attribution 3.0 License.

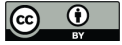

*Supplement of*

## **Impacts of rice varieties and management on yield-scaled greenhouse gas emissions from rice fields in China: A meta-analysis**

**H. Zheng et al.**

*Correspondence to:* H. Huang (hh863@126.com) and J. Tang (jtang@mbl.edu)

## Supplementary materials:

Table S1: Field observations used in the meta-analysis to evaluate the mean CH<sub>4</sub> and N<sub>2</sub>O emissions, area-scaled GWP, rice yield, and yield-scaled GWP of rice variety (Abbreviations: japonica (J), Indica (I); Growth duration after transplant (GDAT))

| No. | Rice variety   | J/I | GDAT | n | f | o | CH <sub>4</sub> (kg CO <sub>2</sub> eq ha <sup>-1</sup> ) | N <sub>2</sub> O(kg CO <sub>2</sub> eq ha <sup>-1</sup> ) | Area-scaled GWP<br>(kg CO <sub>2</sub> eq ha <sup>-1</sup> ) | Yield<br>(Mg ha <sup>-1</sup> ) | Yield-scaled GWP<br>(kg CO <sub>2</sub> eq Mg <sup>-1</sup> ) | Refs.             |
|-----|----------------|-----|------|---|---|---|-----------------------------------------------------------|-----------------------------------------------------------|--------------------------------------------------------------|---------------------------------|---------------------------------------------------------------|-------------------|
| 1   | Zhefu7hao      | I   | 71   | 3 | 5 | 4 | 1921.0                                                    | 268.0                                                     | 2189.0                                                       | 5.337                           | 410.2                                                         | Shi et al 2011a   |
| 2   | Zhefu7hao      | I   | 71   | 3 | 5 | 4 | 2277.0                                                    | 161.0                                                     | 2438.0                                                       | 4.802                           | 507.7                                                         | Shi et al 2011a   |
| 3   | Zhefu7hao      | I   | 71   | 3 | 5 | 4 | 1976.0                                                    | 250.0                                                     | 2226.0                                                       | 3.605                           | 617.5                                                         | Shi et al 2011a   |
| 4   | Zhefu7hao      | I   | 71   | 3 | 5 | 4 | 1955.0                                                    | 250.0                                                     | 2205.0                                                       | 5.245                           | 420.4                                                         | Shi et al 2011a   |
| 5   | Jiayuzao17     | I   | 77   | 3 | 5 | 5 | 1256.6                                                    | 1146.7                                                    | 2403.3                                                       | 7.083                           | 339.3                                                         | Shi et al 2011b   |
| 6   | Jiayuzao17     | I   | 77   | 3 | 5 | 5 | 3811.5                                                    | 441.9                                                     | 4253.4                                                       | 7.058                           | 602.6                                                         | Shi et al 2011b   |
| 7   | Jiayuzao17     | I   | 77   | 3 | 5 | 5 | 2069.8                                                    | 695.8                                                     | 2765.5                                                       | 6.966                           | 397.0                                                         | Shi et al 2011b   |
| 8   | Jiayuzao17     | I   | 77   | 3 | 5 | 5 | 3931.6                                                    | 309.6                                                     | 4241.2                                                       | 6.850                           | 619.1                                                         | Shi et al 2011b   |
| 9   | Jiayuzao17     | I   | 77   | 3 | 5 | 5 | 1875.7                                                    | 506.5                                                     | 2382.3                                                       | 6.925                           | 344.0                                                         | Shi et al 2011b   |
| 10  | Xiang 24       | I   | 77   | 3 | 2 | 3 | 4541.3                                                    | 50.7                                                      | 4592.0                                                       | 5.465                           | 840.3                                                         | Shang et al. 2011 |
| 11  | Xiang 24       | I   | 77   | 3 | 2 | 3 | 4535.0                                                    | 49.2                                                      | 4584.2                                                       | 3.420                           | 1340.4                                                        | Shang et al. 2011 |
| 12  | Xiang 24       | I   | 77   | 3 | 2 | 3 | 5846.3                                                    | 19.4                                                      | 5865.7                                                       | 6.750                           | 869.0                                                         | Shang et al. 2011 |
| 13  | Xiang 45       | I   | 77   | 3 | 2 | 3 | 5262.5                                                    | 32.8                                                      | 5295.3                                                       | 4.560                           | 1161.3                                                        | Shang et al. 2011 |
| 14  | Xiang 45       | I   | 77   | 3 | 2 | 3 | 5332.5                                                    | 62.6                                                      | 5395.1                                                       | 2.010                           | 2684.1                                                        | Shang et al. 2011 |
| 15  | Xiang 45       | I   | 77   | 3 | 2 | 3 | 7335.0                                                    | 62.6                                                      | 7397.6                                                       | 5.270                           | 1403.7                                                        | Shang et al. 2011 |
| 16  | Zhuliangyou211 | I   | 78   | 3 | 5 | 1 | 1777.0                                                    | 43.0                                                      | 1820.0                                                       | 6.151                           | 295.9                                                         | Fu et al. 2012    |
| 17  | Luliangyou819  | I   | 78   | 3 | 5 | 1 | 1720.0                                                    | 21.0                                                      | 1741.0                                                       | 6.133                           | 283.9                                                         | Fu et al. 2012    |
| 18  | Tyou705        | I   | 78   | 3 | 5 | 1 | 1925.0                                                    | 15.0                                                      | 1940.0                                                       | 5.651                           | 343.3                                                         | Fu et al. 2012    |
| 19  | Jingyou402     | I   | 78   | 3 | 5 | 1 | 1638.0                                                    | 10.0                                                      | 1648.0                                                       | 6.707                           | 245.7                                                         | Fu et al. 2012    |
| 20  | Xiangzaoxian17 | I   | 78   | 3 | 5 | 1 | 1802.0                                                    | 25.0                                                      | 1827.0                                                       | 6.262                           | 291.8                                                         | Fu et al. 2012    |
| 21  | Xiangzaoxian24 | I   | 78   | 3 | 5 | 1 | 1729.0                                                    | 29.0                                                      | 1758.0                                                       | 6.522                           | 269.5                                                         | Fu et al. 2012    |
| 22  | Xiangzaoxian45 | I   | 78   | 3 | 5 | 1 | 1839.0                                                    | 44.0                                                      | 1883.0                                                       | 6.411                           | 293.7                                                         | Fu et al. 2012    |

|    |                |   |    |   |   |   |         |        |         |       |        |                                    |
|----|----------------|---|----|---|---|---|---------|--------|---------|-------|--------|------------------------------------|
| 23 | Xiangzaoxian32 | I | 80 | 3 | 5 | 3 | 13003.2 | 304.6  | 13307.8 | 5.385 | 2471.3 | Qin et al. 2006a, Qin et al. 2006b |
| 24 | Xiangzaoxian32 | I | 80 | 3 | 5 | 3 | 11419.2 | 310.7  | 11729.9 | 5.745 | 2041.8 | Qin et al. 2006a, Qin et al. 2006b |
| 25 | Xiangzaoxian32 | I | 80 | 3 | 5 | 3 | 4958.4  | 434.0  | 5392.4  | 5.400 | 998.6  | Qin et al. 2006a, Qin et al. 2006b |
| 26 | Jingyou 207    | I | 86 | 3 | 2 | 3 | 12162.5 | 77.5   | 12240.0 | 4.815 | 2542.1 | Shang et al. 2011                  |
| 27 | Jingyou 207    | I | 86 | 3 | 2 | 3 | 11970.0 | 59.6   | 12029.6 | 4.310 | 2791.1 | Shang et al. 2011                  |
| 28 | Jingyou 207    | I | 86 | 3 | 2 | 3 | 13537.5 | 22.4   | 13559.9 | 5.725 | 2368.5 | Shang et al. 2011                  |
| 29 | Tyou 207       | I | 86 | 3 | 2 | 3 | 12500.0 | 113.2  | 12613.2 | 4.700 | 2683.7 | Shang et al. 2011                  |
| 30 | Tyou 207       | I | 86 | 3 | 2 | 3 | 10242.5 | 32.8   | 10275.3 | 2.800 | 3669.8 | Shang et al. 2011                  |
| 31 | Tyou 207       | I | 86 | 3 | 2 | 3 | 13380.0 | 89.4   | 13469.4 | 4.750 | 2835.7 | Shang et al. 2011                  |
| 32 | Yueyou360      | I | 87 | 3 | 5 | 5 | 2651.8  | 235.4  | 2887.1  | 7.641 | 377.8  | Shi et al 2011b                    |
| 33 | Yueyou360      | I | 87 | 3 | 5 | 5 | 5742.0  | 174.5  | 5916.5  | 7.650 | 773.4  | Shi et al 2011b                    |
| 34 | Yueyou360      | I | 87 | 3 | 5 | 5 | 1832.2  | 223.1  | 2055.3  | 7.567 | 271.6  | Shi et al 2011b                    |
| 35 | Yueyou360      | I | 87 | 3 | 5 | 5 | 9500.4  | 185.0  | 9685.4  | 7.767 | 1247.0 | Shi et al 2011b                    |
| 36 | Yueyou360      | I | 87 | 3 | 5 | 5 | 3716.6  | 518.1  | 4234.7  | 8.033 | 527.2  | Shi et al 2011b                    |
| 37 | Yueyou360      | I | 88 | 3 | 5 | 4 | 4762.0  | 124.0  | 4886.0  | 8.353 | 584.9  | Shi et al 2011a                    |
| 38 | Yueyou360      | I | 88 | 3 | 5 | 4 | 4254.0  | 172.0  | 4426.0  | 7.732 | 572.4  | Shi et al 2011a                    |
| 39 | Yueyou360      | I | 88 | 3 | 5 | 4 | 5734.0  | 86.0   | 5820.0  | 6.869 | 847.3  | Shi et al 2011a                    |
| 40 | Yueyou360      | I | 88 | 3 | 5 | 4 | 4080.0  | 259.0  | 4339.0  | 9.134 | 475.0  | Shi et al 2011a                    |
| 41 | Xinxiangyou80  | I | 88 | 3 | 5 | 3 | 24662.4 | 381.1  | 25043.5 | 5.250 | 4770.2 | Qin et al. 2006a, Qin et al. 2006b |
| 42 | Xinxiangyou80  | I | 88 | 3 | 5 | 3 | 9782.4  | 192.9  | 9975.3  | 5.550 | 1797.3 | Qin et al. 2006a, Qin et al. 2006b |
| 43 | Xinxiangyou80  | I | 88 | 3 | 5 | 3 | 4929.6  | 224.9  | 5154.5  | 5.295 | 973.5  | Qin et al. 2006a, Qin et al. 2006b |
| 44 | Luliangyou996  | I | 88 | 3 | 5 | 5 | 5132.5  | 24.734 | 5157.2  | 3.4   | 1516.8 | Shi et al. 2012                    |
| 45 | Luliangyou996  | I | 88 | 3 | 5 | 5 | 3855    | 60.196 | 3915.2  | 5.95  | 658.0  | Shi et al. 2012                    |
| 46 | Luliangyou996  | I | 90 | 3 | 5 | 5 | 4772.5  | 54.236 | 4826.7  | 7.17  | 673.2  | Shi et al. 2012                    |
| 47 | Luliangyou996  | I | 90 | 3 | 5 | 5 | 5032.5  | 47.084 | 5079.6  | 7.5   | 677.3  | Shi et al. 2012                    |
| 48 | Luliangyou996  | I | 90 | 3 | 5 | 5 | 5972.5  | 61.388 | 6033.9  | 7.37  | 818.7  | Shi et al. 2012                    |
| 49 | Fengyuanyou299 | I | 91 | 3 | 5 | 1 | 4520.0  | 56.0   | 4576.0  | 7.683 | 595.6  | Fu et al. 2012                     |

|    |                |   |     |   |   |    |         |        |         |       |        |                  |
|----|----------------|---|-----|---|---|----|---------|--------|---------|-------|--------|------------------|
| 50 | Weiyu227       | I | 91  | 3 | 5 | 1  | 4188.0  | 53.0   | 4241.0  | 7.053 | 601.3  | Fu et al. 2012   |
| 51 | Yueyou9113     | I | 91  | 3 | 5 | 1  | 4105.0  | 79.0   | 4184.0  | 7.193 | 581.7  | Fu et al. 2012   |
| 52 | Yuzhuxiang     | I | 91  | 3 | 5 | 1  | 4109.0  | 72.0   | 4181.0  | 6.885 | 607.3  | Fu et al. 2012   |
| 53 | Xiangwanxian13 | I | 91  | 3 | 5 | 1  | 6356.0  | 81.0   | 6437.0  | 7.455 | 863.4  | Fu et al. 2012   |
| 54 | Xiangwanxian12 | I | 91  | 3 | 5 | 1  | 4935.0  | 49.0   | 4984.0  | 6.895 | 722.8  | Fu et al. 2012   |
| 55 | Yuzhenxiang    | I | 91  | 3 | 5 | 1  | 4700.0  | 55.0   | 4755.0  | 6.265 | 759.0  | Fu et al. 2012   |
| 56 | Cliangyou396   | I | 95  | 3 | 5 | 5  | 5667.5  | 31.29  | 5698.8  | 5.5   | 1036.1 | Shi et al. 2012  |
| 57 | Cliangyou396   | I | 95  | 3 | 5 | 5  | 4907.5  | 51.852 | 4959.4  | 6.52  | 760.6  | Shi et al. 2012  |
| 58 | Cliangyou396   | I | 95  | 3 | 5 | 5  | 5542.5  | 68.54  | 5611.0  | 7.62  | 736.4  | Shi et al. 2012  |
| 59 | Cliangyou396   | I | 95  | 3 | 5 | 5  | 5212.5  | 72.414 | 5284.9  | 9.52  | 555.1  | Shi et al. 2012  |
| 60 | Cliangyou396   | I | 95  | 3 | 5 | 5  | 9197.5  | 67.348 | 9264.8  | 8.61  | 1076.1 | Shi et al. 2012  |
| 61 | Liangyoupeijiu | I | 100 | 3 | 3 | 2  | 5035.8  | 658.75 | 5694.6  | 6.586 | 864.6  | Yuan et al. 2009 |
| 62 | Liangyoupeijiu | I | 102 | 3 | 3 | 2  | 5702.5  | 536.4  | 6238.9  | 7.490 | 833.0  | Yuan et al. 2009 |
| 63 | Suyou5356      | J | 105 | 3 | 5 | 12 | 569.4   | 7.1    | 576.5   | 7.42  | 77.7   | Ma et al. 2007   |
| 64 | Suyou5356      | J | 105 | 3 | 5 | 12 | 826.8   | 13.2   | 840.0   | 7.69  | 109.2  | Ma et al. 2007   |
| 65 | Suyou5356      | J | 105 | 3 | 5 | 12 | 998.4   | 7.3    | 1005.7  | 7.18  | 140.1  | Ma et al. 2007   |
| 66 | Suyou5356      | J | 105 | 3 | 5 | 12 | 1255.8  | 11.0   | 1266.8  | 7.24  | 175.0  | Ma et al. 2007   |
| 67 | Suyou5356      | J | 105 | 3 | 5 | 12 | 1723.8  | 2.7    | 1726.5  | 7.04  | 245.2  | Ma et al. 2007   |
| 68 | Suyou5356      | J | 105 | 3 | 5 | 12 | 2028.0  | 4.7    | 2032.7  | 6.68  | 304.3  | Ma et al. 2007   |
| 69 | Suyou5356      | J | 105 | 3 | 5 | 12 | 5633.9  | 56.4   | 5690.3  | 7.38  | 771.0  | Ma et al. 2007   |
| 70 | Suyou5356      | J | 105 | 3 | 5 | 12 | 5865.3  | 130.2  | 5995.5  | 8.08  | 742.0  | Ma et al. 2007   |
| 71 | Suyou5356      | J | 105 | 3 | 5 | 12 | 3766.6  | 53.6   | 3820.1  | 7.35  | 519.7  | Ma et al. 2007   |
| 72 | Suyou5356      | J | 105 | 3 | 5 | 12 | 5083.3  | 133.4  | 5216.6  | 7.49  | 696.5  | Ma et al. 2007   |
| 73 | Suyou5356      | J | 105 | 3 | 5 | 12 | 17372.5 | 17.2   | 17389.7 | 7.03  | 2473.6 | Ma et al. 2007   |
| 74 | Suyou5356      | J | 105 | 3 | 5 | 12 | 21841.3 | 23.1   | 21864.4 | 6.61  | 3307.8 | Ma et al. 2007   |
| 75 | Taifuxuan      | J | 112 | 3 | 5 | 4  | 7996.8  | 52.1   | 8048.9  | 5.976 | 1346.9 | Cai et al. 1997  |
| 76 | Taifuxuan      | J | 112 | 3 | 5 | 4  | 20630.4 | 50.5   | 20680.9 | 6.021 | 3434.8 | Cai et al. 1997  |

|     |              |   |     |   |   |   |         |        |         |        |        |                                     |
|-----|--------------|---|-----|---|---|---|---------|--------|---------|--------|--------|-------------------------------------|
| 77  | Taifuxuan    | J | 112 | 3 | 5 | 4 | 9004.8  | 292.4  | 9297.2  | 7.262  | 1280.3 | Cai et al. 1997                     |
| 78  | Taifuxuan    | J | 112 | 3 | 5 | 4 | 19152.0 | 184.2  | 19336.2 | 6.919  | 2794.7 | Cai et al. 1997                     |
| 79  | Wuyujing     | J | 119 | 3 | 5 | 2 | 1142.0  | 396.3  | 1538.3  | 8.130  | 189.2  | Zou et al. 2009                     |
| 80  | Wuyujing     | J | 119 | 3 | 5 | 2 | 1451.0  | 667.52 | 2118.5  | 8.910  | 237.8  | Zou et al. 2009                     |
| 81  | Wuyunjing7   | J | 120 | 3 | 5 | 6 | 3167.5  | 53.64  | 3221.1  | 4.400  | 732.1  | Qin et al. 2010                     |
| 82  | Wuyunjing7   | J | 120 | 3 | 5 | 6 | 1525.0  | 92.38  | 1617.4  | 4.670  | 346.3  | Qin et al. 2010                     |
| 83  | Wuyunjing7   | J | 120 | 3 | 5 | 6 | 1247.5  | 116.22 | 1363.7  | 4.750  | 287.1  | Qin et al. 2010                     |
| 84  | Kenjiangdao  | J | 120 | 3 | 5 | 4 | 3928.6  | 561.2  | 4489.8  | 6.6128 | 679.0  | Chen et al. 2007; Wang et al. 2008  |
| 85  | Kenjiangdao  | J | 120 | 3 | 5 | 4 | 3889.5  | 532.7  | 4422.1  | 6.8692 | 643.8  | Chen et al. 2007; Wang et al. 2008  |
| 86  | Kenjiangdao  | J | 120 | 3 | 5 | 4 | 5495.0  | 751.5  | 6246.5  | 4.9304 | 1266.9 | Chen et al. 2007; Wang et al. 2008  |
| 87  | Kenjiangdao  | J | 120 | 3 | 5 | 4 | 4381.8  | 1293.7 | 5675.5  | 5.5902 | 1015.3 | Chen et al. 2007; Wang et al. 2008  |
| 88  | Wuyunjing7   | J | 122 | 3 | 5 | 6 | 2632.5  | 14.9   | 2647.4  | 5.480  | 483.1  | Qin et al. 2010                     |
| 89  | Wuyunjing7   | J | 122 | 3 | 5 | 6 | 1235.0  | 268.2  | 1503.2  | 6.200  | 242.5  | Qin et al. 2010                     |
| 90  | Wuyunjing7   | J | 122 | 3 | 5 | 6 | 922.5   | 387.4  | 1309.9  | 6.510  | 201.2  | Qin et al. 2010                     |
| 91  | Changyou1hao | J | 123 | 3 | 5 | 2 | 4384.0  | 1034.1 | 5418.1  | 9.633  | 562.5  | Zhang et al. 2009                   |
| 92  | Changyou1hao | J | 123 | 3 | 5 | 2 | 5076.0  | 1236.7 | 6312.7  | 9.561  | 660.3  | Zhang et al. 2009                   |
| 93  | Wuyunjing7   | J | 123 | 3 | 3 | 3 | 1732.5  | 593    | 2325.5  | 9.100  | 255.5  | Zhang et al. 2010b                  |
| 94  | Wuyunjing7   | J | 123 | 3 | 3 | 3 | 1680.0  | 354.6  | 2034.6  | 9.900  | 205.5  | Zhang et al. 2010b                  |
| 95  | Wuyunjing7   | J | 123 | 3 | 3 | 3 | 2675.0  | 292    | 2967.0  | 10.200 | 290.9  | Zhang et al. 2010b                  |
| 96  | Huajing3     | J | 123 | 3 | 5 | 2 | 1084.8  | 1162.2 | 2247.0  | 7.920  | 283.7  | Li et al. 2009b                     |
| 97  | suijing3hao  | J | 125 | 3 | 5 | 3 | 622.5   | 165.5  | 788.0   | 6.376  | 123.6  | Yue et al., 2003*; Yue et al., 2005 |
| 98  | suijing3hao  | J | 125 | 3 | 5 | 3 | 720.0   | 67.8   | 787.8   | 6.333  | 124.4  | Yue et al., 2003*; Yue et al., 2005 |
| 99  | suijing3hao  | J | 125 | 3 | 5 | 3 | 420.0   | 231.7  | 651.7   | 6.320  | 103.1  | Yue et al., 2003*; Yue et al., 2005 |
| 100 | Nanjing44    | J | 126 | 3 | 5 | 5 | 557.3   | 286.4  | 843.7   | 9.905  | 85.2   | Sun et al. 2012                     |
| 101 | Nanjing44    | J | 126 | 3 | 5 | 5 | 2611.8  | 72.9   | 2684.6  | 9.596  | 279.8  | Sun et al. 2012                     |
| 102 | Nanjing44    | J | 126 | 3 | 5 | 5 | 4049.3  | 46.8   | 4096.0  | 9.205  | 445.0  | Sun et al. 2012                     |
| 103 | Nanjing44    | J | 126 | 3 | 5 | 5 | 654.0   | 59.7   | 713.7   | 10.322 | 69.1   | Sun et al. 2012                     |

|     |                |   |     |   |   |   |         |         |         |        |        |                                                        |
|-----|----------------|---|-----|---|---|---|---------|---------|---------|--------|--------|--------------------------------------------------------|
| 104 | Nanjing44      | J | 126 | 3 | 5 | 5 | 534.8   | 74.4    | 609.1   | 10.147 | 60.0   | Sun et al. 2012                                        |
| 105 | Huajing3       | J | 126 | 3 | 5 | 1 | 1725.0  | 336.4   | 2061.4  | 5.260  | 391.9  | Ma et al. 2009                                         |
| 106 | Liangyoupeiiju | I | 128 | 3 | 5 | 4 | 8560.0  | 224.75  | 8784.8  | 6.790  | 1293.8 | Ahmad et al., 2009; Li et al. 2009                     |
| 107 | Liangyoupeiiju | I | 128 | 3 | 5 | 4 | 11022.5 | 174.94  | 11197.4 | 6.663  | 1680.6 | Ahmad et al., 2009; Li et al. 2009                     |
| 108 | Liangyoupeiiju | I | 128 | 3 | 5 | 4 | 12920.0 | 2210.3  | 15130.3 | 9.541  | 1585.8 | Ahmad et al., 2009; Li et al. 2009                     |
| 109 | Liangyoupeiiju | I | 128 | 3 | 5 | 4 | 16490.0 | 1671.78 | 18161.8 | 9.524  | 1906.9 | Ahmad et al., 2009; Li et al. 2009                     |
| 110 | Liangyoupeiiju | I | 128 | 3 | 5 | 2 | 12920.0 | 2210.3  | 15130.3 | 9.541  | 1585.8 | Dai et al. 2009; Ahmad et al., 2009;<br>Li et al. 2009 |
| 111 | Liangyoupeiiju | I | 128 | 3 | 5 | 2 | 16490.0 | 1671.78 | 18161.8 | 9.524  | 1906.9 | Dai et al. 2009; Ahmad et al., 2009;<br>Li et al. 2009 |
| 112 | Suyou5363      | J | 131 | 3 | 5 | 1 | 1612.5  | 92.5    | 1705.0  | 6.960  | 245.0  | Ma et al. 2009                                         |
| 113 | Huajing3       | J | 139 | 3 | 5 | 2 | 792.3   | 1546.6  | 2338.9  | 5.460  | 428.4  | Li et al. 2009b                                        |
| 114 | Kongyu131      | J | 145 | 3 | 2 | 1 | 7660.8  | 59.9    | 7720.7  | 8.970  | 860.7  | Mu et al. 2011                                         |
| 115 | Longjing18     | J | 145 | 3 | 2 | 1 | 13659.0 | 39.0    | 13698.0 | 8.412  | 1628.4 | Mu et al. 2011                                         |
| 116 | Kenjiandao6    | J | 145 | 3 | 2 | 1 | 11810.4 | 40.9    | 11851.3 | 8.902  | 1331.3 | Mu et al. 2011                                         |
| 117 | Changyou1hao   | J | 156 | 3 | 5 | 4 | 10816.3 | 554.28  | 11370.5 | 10.181 | 1116.8 | Zhang et al. 2010a                                     |
| 118 | Changyou1hao   | J | 156 | 3 | 5 | 4 | 4384.0  | 1034.06 | 5418.1  | 9.633  | 562.4  | Zhang et al. 2010a                                     |
| 119 | Changyou1hao   | J | 156 | 3 | 5 | 4 | 10059.0 | 771.82  | 10830.8 | 9.780  | 1107.4 | Zhang et al. 2010a                                     |
| 120 | Changyou1hao   | J | 156 | 3 | 5 | 4 | 5076.0  | 1236.7  | 6312.7  | 9.561  | 660.3  | Zhang et al. 2010a                                     |

\* Yield data were obtained from these papers. (Similarly hereinafter)

Table S2: Field observations used in the meta-analysis to determine the impacts of N fertilization on CH<sub>4</sub> and N<sub>2</sub>O emissions, area-scaled GWP, rice yield, and yield-scaled GWP

| No. | Rice variety  | N     | n | f | Response ratio  |                  |                 |       |                  | Refs.                              |
|-----|---------------|-------|---|---|-----------------|------------------|-----------------|-------|------------------|------------------------------------|
|     |               |       |   |   | CH <sub>4</sub> | N <sub>2</sub> O | Area-scaled GWP | Yield | Yield-scaled GWP |                                    |
| 1   | Zhefu7hao     | 52.5  | 3 | 5 | 0.63            | 2.00             | 0.68            | 2.06  | 0.33             | Shi et al 2011a                    |
| 2   | Yueyou360     | 67.5  | 3 | 5 | 3.67            | 1.37             | 3.58            | 1.25  | 2.89             | Shi et al 2011a                    |
| 3   | Xiang24       | 81.3  | 3 | 5 | 1.16            | 39.70            | 1.17            | 1.63  | 0.76             | Shang et al. 2011                  |
| 4   | Xiang 45      | 81.3  | 3 | 5 | 1.23            | 1.26             | 1.23            | 1.77  | 0.78             | Shang et al. 2011                  |
| 5   | Taifuxuan     | 100   | 3 | 5 | 0.49            | 1.25             | 0.50            | 1.15  | 0.44             | Cai et al. 1997                    |
| 6   | Jingyou27     | 101.7 | 3 | 5 | 1.24            | 4.46             | 1.25            | 1.25  | 1.03             | Shang et al. 2011                  |
| 7   | Tyou207       | 101.7 | 3 | 5 | 0.93            | 2.93             | 0.94            | 1.37  | 0.70             | Shang et al. 2011                  |
| 8   | Zhefu7hao     | 105   | 3 | 2 | 0.73            | 1.29             | 0.75            | 2.75  | 0.27             | Shi et al 2011a                    |
| 9   | Luliangyou996 | 120   | 3 | 5 | 0.93            | 2.19             | 0.94            | 2.11  | 0.44             | Shi et al. 2012                    |
| 10  | Jiayuzao17    | 132   | 3 | 5 | 2.44            | 3.35             | 2.49            | 2.07  | 1.21             | Shi et al 2011b                    |
| 11  | Jiayuzao17    | 132   | 3 | 5 | 1.16            | 5.48             | 1.40            | 2.07  | 0.67             | Shi et al 2011b                    |
| 12  | Yueyou360     | 135   | 3 | 5 | 2.72            | 2.75             | 2.72            | 1.40  | 1.95             | Shi et al 2011a                    |
| 13  | Cliangyou396  | 135   | 3 | 5 | 0.92            | 2.31             | 0.93            | 1.73  | 0.54             | Shi et al. 2012                    |
| 14  | Yueyou360     | 144   | 3 | 5 | 4.75            | 4.78             | 4.75            | 2.01  | 2.37             | Shi et al 2011b                    |
| 15  | Yueyou360     | 144   | 3 | 5 | 1.86            | 13.37            | 2.08            | 2.06  | 1.00             | Shi et al 2011b                    |
| 16  | Jiayuzao17    | 148.5 | 3 | 5 | 2.36            | 4.78             | 2.49            | 2.13  | 1.18             | Shi et al 2011b                    |
| 17  | Jiayuzao17    | 148.5 | 3 | 5 | 1.28            | 7.53             | 1.62            | 2.10  | 0.78             | Shi et al 2011b                    |
| 18  | Zhefu7hao     | 150   | 3 | 2 | 0.61            | 2.14             | 0.67            | 3.04  | 0.22             | Shi et al 2011a                    |
| 19  | Kenjiangdao   | 150   | 3 | 5 | 0.90            | 1.84             | 0.96            | 1.45  | 0.67             | Chen et al. 2007; Wang et al. 2008 |
| 20  | Luliangyou996 | 150   | 3 | 5 | 0.96            | 2.46             | 0.96            | 1.96  | 0.49             | Shi et al. 2012                    |
| 21  | Yueyou360     | 162   | 3 | 5 | 2.87            | 4.50             | 2.90            | 1.99  | 1.47             | Shi et al 2011b                    |
| 22  | Yueyou360     | 162   | 3 | 5 | 0.92            | 5.76             | 1.01            | 1.96  | 0.52             | Shi et al 2011b                    |
| 23  | Jiayuzao17    | 165   | 3 | 5 | 0.78            | 12.41            | 1.41            | 2.13  | 0.66             | Shi et al 2011b                    |
| 24  | Cliangyou396  | 165   | 3 | 5 | 1.24            | 1.90             | 1.25            | 1.38  | 0.89             | Shi et al. 2012                    |
| 25  | Zhefu7hao     | 178   | 3 | 5 | 0.62            | 2.00             | 0.68            | 2.98  | 0.23             | Shi et al 2011a                    |

|    |                |     |   |   |      |      |      |      |      |                                                    |
|----|----------------|-----|---|---|------|------|------|------|------|----------------------------------------------------|
| 26 | Yueyou360      | 180 | 3 | 5 | 3.04 | 1.98 | 3.00 | 1.51 | 1.99 | Shi et al 2011a                                    |
| 27 | Yueyou360      | 180 | 3 | 5 | 1.33 | 6.08 | 1.42 | 1.96 | 0.72 | Shi et al 2011b                                    |
| 28 | Luliangyou996  | 180 | 3 | 5 | 0.98 | 1.90 | 0.98 | 2.21 | 0.45 | Shi et al. 2012                                    |
| 29 | Cliangyou396   | 195 | 3 | 3 | 0.98 | 2.19 | 0.98 | 1.39 | 0.71 | Shi et al. 2012                                    |
| 30 | suyou5356      | 200 | 3 | 2 | 0.80 | 3.87 | 0.81 | 1.18 | 0.71 | Ma et al. 2007                                     |
| 31 | Wuyunjing      | 200 | 3 | 5 | 0.90 | 3.22 | 1.14 | 2.40 | 0.47 | Zou et al. 2009                                    |
| 32 | Yueyou360      | 210 | 3 | 5 | 2.61 | 4.14 | 2.67 | 1.65 | 1.62 | Shi et al 2011a                                    |
| 33 | Liangyoupeijiu | 210 | 3 | 5 | 1.50 | 9.71 | 1.67 | 1.42 | 1.17 | Dai et al. 2009; Ahmad et al., 2009;Li et al. 2009 |
| 34 | Kenjiangdao    | 250 | 3 | 5 | 0.79 | 2.56 | 0.90 | 1.55 | 0.57 | Chen et al. 2007; Wang et al. 2008                 |
| 35 | suyou5356      | 270 | 3 | 5 | 0.99 | 8.48 | 1.00 | 1.20 | 0.90 | Ma et al. 2007                                     |
| 36 | Wuyunjing7     | 300 | 3 | 2 | 0.90 | 2.18 | 1.00 | 1.04 | 0.96 | Zhang et al. 2010b                                 |
| 37 | Taifuxuan      | 300 | 3 | 5 | 0.89 | 5.83 | 0.98 | 1.37 | 0.72 | Cai et al. 1997                                    |



## References

- Ahmad S**, Li CF, Dai GZ, Zhan M, Wanga JP, Pan SG, Cao CG (2009) Greenhouse gas emission from direct seeding paddy field under different rice tillage systems in central China. *Soil & Tillage Research*.106:54–61
- Cai Z**, Xing G, Yan X, Xu H, Tsuruta H, Yagi K, Minami K. (1997) Methane and nitrous oxide emissions from rice paddy fields as affected by nitrogen fertilisers and water management. *Plant and Soil* 196, 7-14.
- Chen W**. (2007) N<sub>2</sub>O emissions from Paddy field ecosystem in Sanjiang Plain. MD thesis, Jilin Agricultural University, Changchun
- Dai G**, Li C, Cao C, Zhan M, Tong L, Mei S, Zhai, Z, Fan D. (2009) Effect of no-tillage and fertilization on paddy soil CH<sub>4</sub> and N<sub>2</sub>O emissions and their greenhouse effect in Central China. *Chinese Journal of Applied Ecology* 20, 2166-2172.
- Kreye C**, Dittert K, Zheng X, Zhang X, Lin S, Tao H, Sattelmacher B (2007). Fluxes of methane and nitrous oxide in water-saving rice production in north China. *Nutrient Cycling in Agroecosystems* 77, 293-304.
- Fu ZQ**, Zhu HW, Chen C, Huang H (2012) Characterization of CH<sub>4</sub>, N<sub>2</sub>O Emission and Selection of Rice Cultivars in Double Cropping Rice Fields. *Environmental Science* 33(7): 2475-2481
- Li XL**, Zhang XY, Xu H, Cai ZC, Yagi Kazuyuki (2009a). Methane and nitrous oxide emissions from rice paddy soil as influenced by timing of application of hydroquinone and dicyandiamide. *Nutr Cycl Agroecosyst* 85:31-40
- Li CF**, Cao CG, JP Wang, ZB Zhai, Mei SH (2009b) CH<sub>4</sub> and CO<sub>2</sub> Emissions from Paddy Soils and Assessment of Carbon Budget in Different Tillage Systems. *Journal of Agro-Environment Science*. 28(12):2482-2488
- Ma J**, Li XL, Xu H, Han Y, Cai ZC, Yagi K. (2007) Effects of nitrogen fertiliser and wheat straw application on CH<sub>4</sub> and N<sub>2</sub>O emissions from a paddy rice field. *Australian Journal of Soil Research* 45, 359-367.
- Ma J**, Ma E, Xu H, Yagi K, Cai Z. (2009) Wheat straw management affects CH<sub>4</sub> and N<sub>2</sub>O emissions from rice fields. *Soil Biology and Biochemistry* 41, 1022-1028.
- Mu CC**, Tao XY, Huang ZW, Yu LL (2001) Effects of Rice Varieties on Emission of Greenhouse Gases from Paddy in Sanjiang Plain. *Journal of Northeast Forestry University*.39(11) 89 -92,107
- Qin X**, Li Y, Liu K, Wan Y. (2006a) Methane and nitrous oxide emission from paddy field under different fertilization treatments. *Transactions of the CSAE* 22, 143-149.
- Qin X**, Li Y, Liu K, Wan Y, Gao Q. (2006b) The effect of long-term fertilization treatment on methane emission from rice field in Hunan. *Chinese Journal of Agrometeorology* 27, 19-22.
- Qin Y**, Liu S, Guo Y, Liu Q, Zou J. (2010) Methane and nitrous oxide emissions from organic and conventional rice cropping systems in Southeast China. *Biology and Fertility of Soils* 46, 825-834.
- Shang Q**, Yang XX, Gao CM, Wu PP, Liu JJ, Xu YC, Shen QR, Zou JW, Guo SW (2011) Net annual global warming potential and greenhouse gas intensity in Chinese double rice-cropping systems: a 3-year field measurement in long-term fertilizer experiments. *Global Change Biology* 17, 2196-2210
- Shi SW**, Li YE, Li MD, Wan YF, Gao QZ, Hua P, Qing XB (2011b) Annual CH<sub>4</sub> and N<sub>2</sub>O Emissions from Double Rice Cropping Systems under Various Fertilizer Regimes in

Hunan Province, China. Chinese journal of atmospheric science 35(4): 707-720

**Shi** SW, Li YE, Wan YF, Qing XB, Gao QZ (2011a) Observation for CH<sub>4</sub> and N<sub>2</sub>O Emissions Under Different Rates of Nitrogen and Phosphate Fertilization in Double Rice Fields. Environmental science 32(7): 1989-1907

**Shi** YW (2012). Studies on Ammonia Volatilization and Greenhouse Gas Emissions in Different Cultivation Modes under Double-harvest Rice System. MD thesis, Hunan Agriculture University, Changsha.

**Sun** GF, Zhang JC, Chen LG, He JJ, Zhang YF (2012). Effects of pig manure and biogas slurry application on CH<sub>4</sub> and N<sub>2</sub>O emissions and their greenhouse effects on paddy field. Journal of China agricultural university, 17(5):124-131

**Wang** Y, Chen W, Zhao Z, Gu J (2008). Characteristics and estimation of CH<sub>4</sub>, N<sub>2</sub>O emission from cold paddy field in the Sanjiang Plain. Transactions of the CSAE 24, 170-176.

**Yuan** W, Cao C, Li C, Zhan M, Cai M, Wang J. (2009). Methane and nitrous oxide emissions from rice-fish and rice-duck complex ecosystems and the evaluation of their economic significance. Scientia Agricultura Sinica 42, 2052-2060.

**Yue** J, Liang W, Wu J, Shi Y, Huang G. (2003). CH<sub>4</sub> and N<sub>2</sub>O emission from phaeozem rice field and their mitigative measures. Chinese Journal of Applied Ecology 14, 2015-2018.

**Yue** J, Shi Y, Liang W, Wu J, Wang C, Huang G. (2005) Methane and Nitrous Oxide Emissions from Rice Field and Related Microorganism in Black Soil, Northeastern China. Nutrient Cycling in Agroecosystems 73, 293-301.

**Zhang** A, Cui L, Pan G, Li L, Hussain Q, Zhang X, Zheng J, Crowley D. (2010a). Effect of biochar amendment on yield and methane and nitrous oxide emissions from a rice paddy from Tai Lake plain, China. Agriculture, Ecosystems & Environment 139, 469-475.

**Zhang** Y, Chen L, Wang Z, Zhang C, ZHU P, Sheng J, Zheng J. (2010b). Characteristics of CH<sub>4</sub> and N<sub>2</sub>O emissions and greenhouse effects for mechanical transplanting rice in rice-wheat rotation system. Journal of Agro-Environment Science 29, 1403-1409.

**Zhang** Y, Zheng J, Chen L, Wang Z, Zhu P, Shen J, Wang Y. (2009). Effects of wheat straw returning and soil tillage on CH<sub>4</sub> and N<sub>2</sub>O emissions in paddy season. Ecology and Environmental Sciences 18, 2334-2338.

**Zou** J, Liu S, Qin Y, Pan G, Zhu D. (2009). Sewage irrigation increased methane and nitrous oxide emissions from rice paddies in southeast China. Agriculture, Ecosystems & Environment, 129, 516-522.
